# Supplementary material for: Pharmacokinetics, tissue distribution, and antitumor activity of a novel compound, NY-2, in non-small cell lung cancer
Source: Front Pharmacol. 2023 Jan 16;13:1074576. doi: 10.3389/fphar.2022.1074576 (PMC9884808; doi:10.3389/fphar.2022.1074576)
Supplement: Supplementary file 3 [file Table3.xls]

## Sheet: Sheet1
软件版本	2.01.14
实验文件路径:
方案文件路径:
板编号	板1
日期	2014-09-24
时间	1899-12-31 20:50:42
检测仪类型:	ELx800
检测仪序列号:	Unknown
检测类型	检测仪
程序详细信息
板类型	96 WELL PLATE
检测	吸收光 终点
	全板
	波长: 490
	检测速度: 正常
结果
		1	2	3	4	5	6	7	8	9	10	11	12
	A	0.039	0.04	0.04	0.041	0.04	0.04	0.039	0.039	0.038	0.038	0.038	0.038	490
	B	0.038	0.058	0.568	0.566	0.568	0.586	0.554	0.506	0.239	0.117	0.082	0.038	490
	C	0.038	0.054	0.586	0.57	0.571	0.572	0.559	0.566	0.238	0.148	0.066	0.038	490
	D	0.038	0.057	0.599	0.623	0.608	0.595	0.592	0.557	0.224	0.121	0.072	0.039	490
	E	0.038	0.057	0.568	0.038	0.039	0.039	0.038	0.038	0.038	0.038	0.038	0.038	490
	F	0.038	0.055	0.649	0.039	0.038	0.038	0.038	0.038	0.038	0.039	0.038	0.038	490
	G	0.042	0.056	0.571	0.039	0.038	0.039	0.038	0.038	0.038	0.038	0.038	0.039	490
	H	0.038	0.038	0.039	0.039	0.038	0.038	0.038	0.038	0.038	0.038	0.038	0.038	490
对照	空白		0.3125	0.625	1.25	2.5	5	10	20	40
0.058	0.568		0.566	0.568	0.586	0.554	0.506	0.239	0.117	0.082
0.054	0.586		0.57	0.571	0.572	0.559	0.566	0.238		0.066
0.057	0.599				0.595	0.592	0.557	0.224	0.121	0.072
0.057	0.568	平均值	0.568	0.5695	0.584333	0.568333	0.543	0.233667	0.119	0.0733333
0.055		抑制率	0.0199145	0.0170422	-0.0113615	0.0192762	0.0677858	0.660114	0.879683	0.967128
0.056	0.571
0.0561667	0.5784	平均值

## Sheet: Sheet2
软件版本	2.01.14
实验文件路径:
方案文件路径:
板编号	板3
日期	2014-09-23
时间	1899-12-31 14:40:28
检测仪类型:	ELx800
检测仪序列号:	Unknown
检测类型	检测仪
程序详细信息
板类型	96 WELL PLATE
检测	吸收光 终点
	全板
	波长: 490
	检测速度: 正常
结果
		1	2	3	4	5	6	7	8	9	10	11	12
	A	0.039	0.039	0.038	0.038	0.038	0.039	0.038	0.038	0.038	0.038	0.038	0.038	490
	B	0.038	0.062	0.792	0.78	0.746	0.772	0.766	0.7	0.416	0.188	0.164	0.038	490
	C	0.038	0.063	0.745	0.759	0.775	0.711	0.792	0.706	0.4	0.214	0.182	0.037	490
	D	0.038	0.066	0.774	0.737	0.671	0.704	0.728	0.764	0.378	0.257	0.181	0.037	490
	E	0.037	0.066	0.724	0.707	0.791	0.714	0.75	0.675	0.412	0.178	0.179	0.038	490
	F	0.037	0.065	0.756	0.712	0.729	0.768	0.654	0.613	0.436	0.299	0.144	0.037	490
	G	0.037	0.067	0.803	0.754	0.711	0.739	0.728	0.799	0.413	0.191	0.122	0.038	490
	H	0.038	0.039	0.038	0.038	0.041	0.038	0.04	0.038	0.038	0.038	0.038	0.038	490
空白组	对照组		17号：0.3125	0.625	1.25	2.5	5	10	20	40
0.062	0.792		0.78	0.746		0.766	0.7	0.416	0.188	0.164
0.063	0.745		0.759	0.775	0.711		0.706	0.4	0.214	0.182
0.066	0.774		0.737		0.704	0.728		0.378		0.181
0.066	0.724				0.714	0.75	0.675	0.412	0.178	0.179
0.065	0.756		0.712	0.729	0.768	0.654	0.613			0.144
0.067	0.803		0.754	0.711	0.739	0.728		0.413	0.191
0.0648333	0.765667	平均值	0.7484	0.74025	0.7272	0.7252	0.6735	0.4038	0.19275	0.17
		抑制率	0.0246373	0.0362663	0.054887	0.0577408	0.13151	0.516338	0.817479	0.849941

## Sheet: Sheet3
软件版本	2.01.14
实验文件路径:
方案文件路径:
板编号	板1
日期	2014-09-28
时间	1899-12-31 13:55:36
检测仪类型:	ELx800
检测仪序列号:	Unknown
检测类型	检测仪
程序详细信息
板类型	96 WELL PLATE
检测	吸收光 终点
	全板
	波长: 490
	检测速度: 正常
结果
		1	2	3	4	5	6	7	8	9	10	11	12
	A	0.038	0.039	0.039	0.039	0.039	0.039	0.038	0.038	0.038	0.038	0.038	0.038	490
	B	0.039	0.059	0.655	0.644	0.658	0.603	0.555	0.49	0.289	0.148	0.118	0.038	490
	C	0.038	0.058	0.658	0.622	0.645	0.604	0.563	0.473	0.31	0.162	0.138	0.038	490
	D	0.038	0.059	0.621	0.635	0.621	0.654	0.564	0.437	0.283	0.12	0.132	0.038	490
	E	0.037	0.057	0.641	0.045	0.038	0.038	0.038	0.038	0.038	0.038	0.038	0.038	490
	F	0.037	0.06	0.646	0.042	0.038	0.038	0.038	0.038	0.038	0.038	0.038	0.037	490
	G	0.037	0.056	0.61	0.042	0.038	0.038	0.038	0.038	0.038	0.038	0.038	0.038	490
	H	0.038	0.038	0.038	0.038	0.038	0.038	0.04	0.038	0.038	0.038	0.037	0.038	490
空白	对照		0.3125	0.625	1.25	2.5	5	10	20	40
0.059	0.655		0.644	0.658	0.603	0.555	0.49	0.289	0.148	0.118
0.058			0.622	0.645	0.604	0.563	0.473	0.31	0.162	0.138
0.059	0.621		0.635	0.621		0.564	0.437	0.283	0.12	0.132
0.057	0.641	平均值	0.633667	0.641333	0.6035	0.560667	0.466667	0.294	0.143333	0.129333
0.06	0.646	抑制率	0.0121585	-0.00100129	0.0639394	0.137462	0.298813	0.595194	0.853812	0.877843
0.056
0.0581667	0.64075	平均值
					0.0121585		0.0639394	0.137462	0.298813	0.595194	0.853812	0.877843
					0.0246373	0.0362664	0.054887	0.0577408	0.13151	0.516338	0.817479	0.849941
					0.0398328	0.0722892	0.101205	0.154905	0.276248	0.560315	0.800344	0.852717
				三次抑制率平均值	0.0255429	0.0542778	0.0733437	0.116703	0.235524	0.557282	0.823878	0.860167
				三次细胞存活率平均值	0.974457	0.945722	0.926656	0.883297	0.764476	0.442718	0.176122	0.139833
					0.0121585		0.0639394	0.137462	0.298813	0.595194	0.853812	0.877843
				存活率	0.987842		0.936061	0.862538	0.701187	0.404806	0.146188	0.122157
					0.0246373	0.0362664	0.054887	0.0577408	0.13151	0.516338	0.817479	0.849941
				存活率	0.975363	0.963734	0.945113	0.942259	0.86849	0.483662	0.182521	0.150059
					0.0398328	0.0722892	0.101205	0.154905	0.276248	0.560315	0.800344	0.852717
				存活率	0.960167	0.927711	0.898795	0.845095	0.723752	0.439685	0.199656	0.147283

## Sheet: Sheet4
软件版本	2.01.14
实验文件路径:
方案文件路径:
板编号	板4
日期	2014-09-23
时间	1899-12-31 14:51:17
检测仪类型:	ELx800
检测仪序列号:	Unknown
检测类型	检测仪
程序详细信息
板类型	96 WELL PLATE
检测	吸收光 终点
	全板
	波长: 490
	检测速度: 正常
结果
		1	2	3	4	5	6	7	8	9	10	11	12
	A	0.039	0.039	0.039	0.04	0.039	0.04	0.039	0.038	0.038	0.037	0.038	0.038	490
	B	0.038	0.067	0.752	0.765	0.693	0.844	0.659	0.555	0.384	0.194	0.145	0.038	490
	C	0.038	0.068	0.718	0.718	0.672	0.673	0.63	0.521	0.408	0.218	0.176	0.038	490
	D	0.038	0.074	0.821	0.699	0.712	0.676	0.641	0.531	0.368	0.208	0.175	0.039	490
	E	0.038	0.076	0.718	0.701	0.701	0.675	0.637	0.576	0.379	0.2	0.173	0.038	490
	F	0.037	0.075	0.771	0.751	0.701	0.682	0.666	0.589	0.367	0.218	0.203	0.039	490
	G	0.038	0.073	0.759	0.746	0.727	0.701	0.637	0.592	0.353	0.207	0.164	0.038	490
	H	0.038	0.038	0.039	0.039	0.039	0.039	0.038	0.038	0.038	0.038	0.038	0.038	490
空白	对照		17号：0.3725	0.625	1.25	2.5	5	10	20	40
0.067	0.752			0.693		0.659	0.555	0.384	0.194
0.068			0.718	0.672	0.673	0.63			0.218	0.176
0.074			0.699	0.712	0.676	0.641	0.531	0.368	0.208	0.175
0.076	0.718		0.701	0.701	0.675	0.637	0.576	0.379	0.2	0.173
0.075	0.771		0.751	0.701	0.682	0.666	0.589	0.367	0.218
0.073	0.759		0.746	0.727	0.701	0.637		0.353	0.207	0.164
0.0721667	0.75	平均值	0.723	0.701	0.6814	0.645	0.56275	0.3702	0.2075	0.172
		抑制率	0.0398328	0.0722892	0.101205	0.154905	0.276248	0.560315	0.800344	0.852717
